# Supplementary material
Source: PubMed Central journal article supplement (PMC4304638)

Figure S1

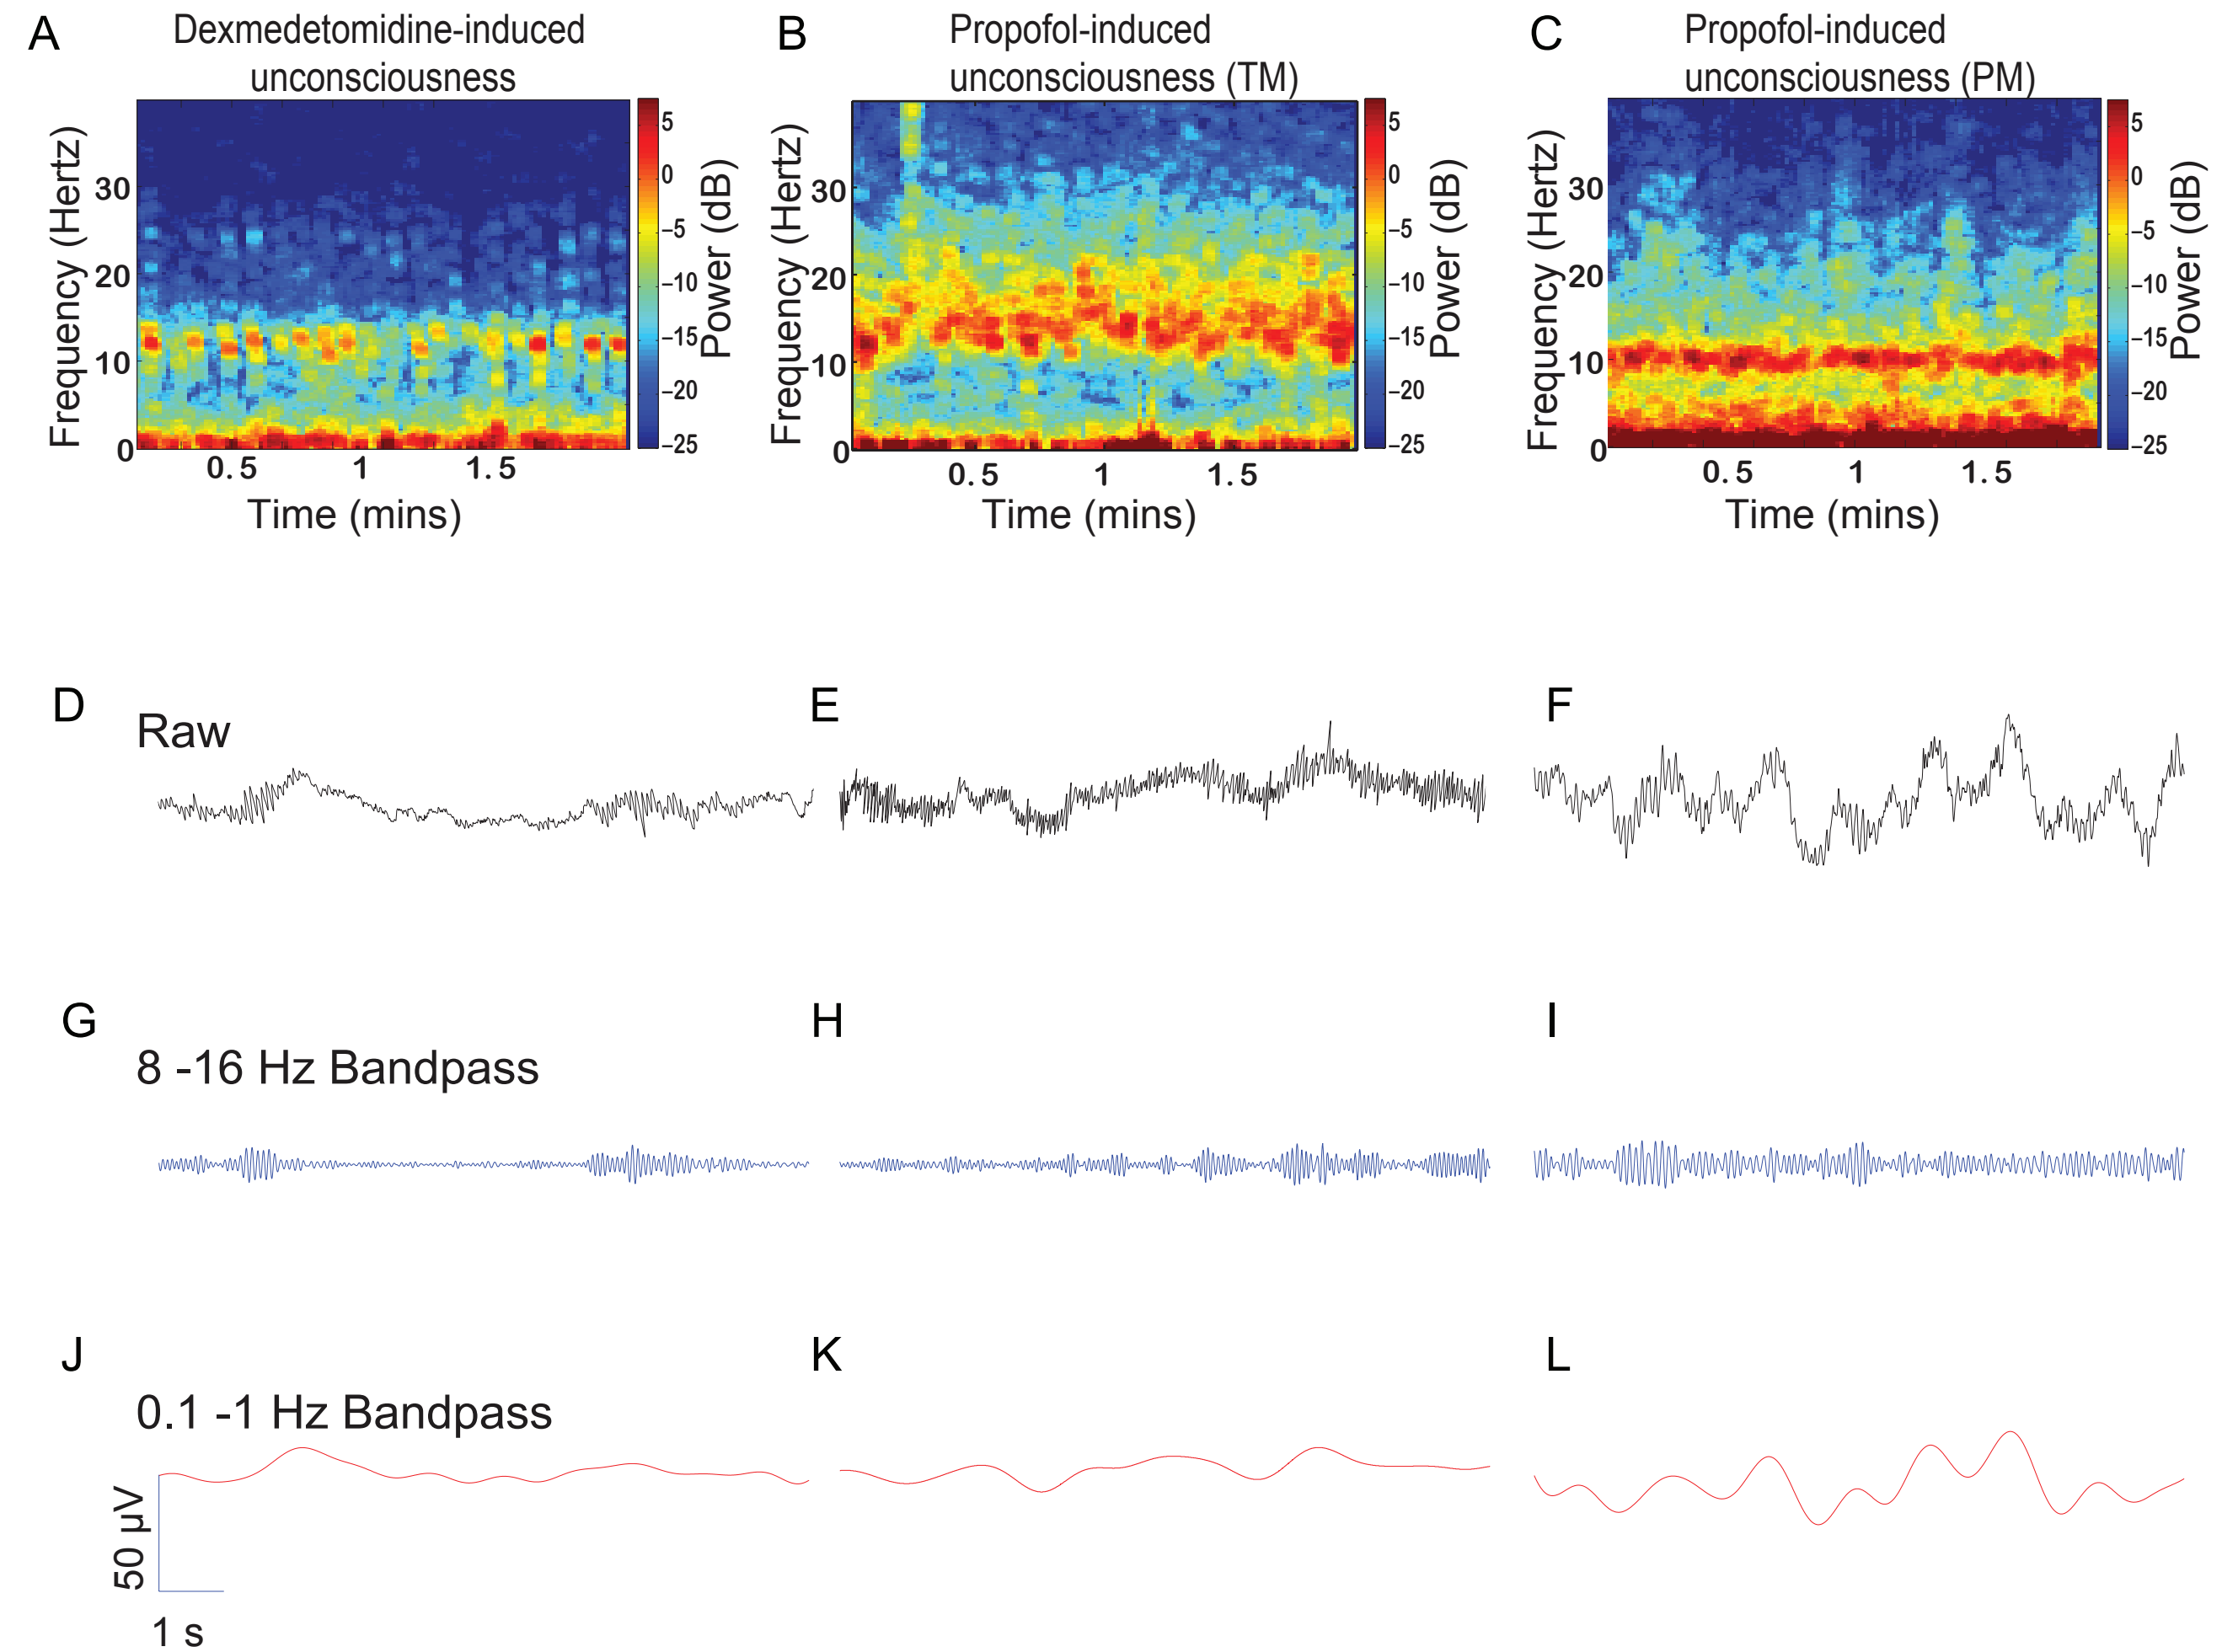

Supplement: NIHMS619322-supplement-2__SDC_Figure.pdf [file NIHMS619322-supplement-2__SDC_Figure.pdf]
